# Supplementary material for: Histone Acetyltransferase-Dependent Pathways Mediate Upregulation of NADPH Oxidase 5 in Human Macrophages under Inflammatory Conditions: A Potential Mechanism of Reactive Oxygen Species Overproduction in Atherosclerosis
Source: Hindawi journal article supplement (doi:10.1155/2019/3201062), 2019-09-02
Supplement: f1 [file 3201062.f1.pdf]

## **Supplementary Material**

### **Histone acetyltransferase-dependent pathways mediate up-regulation of NADPH oxidase 5 in human macrophages under inflammatory conditions: a potential mechanism of reactive oxygen species overproduction in atherosclerosis**

Mihaela-Loredana Vlad<sup>1</sup>, Simona-Adriana Manea<sup>1</sup>, Alexandra-Gela Lazar<sup>1</sup>, Monica Raicu<sup>1</sup>,  
Horia Muresian<sup>2</sup>, Maya Simionescu<sup>1</sup>, Adrian Manea<sup>1\*</sup>

<sup>1</sup> Institute of Cellular Biology and Pathology “Nicolae Simionescu” of the Romanian  
Academy, Bucharest, Romania

<sup>2</sup> University Hospital Bucharest, Cardiovascular Surgery Department, Bucharest, Romania

**\*Corresponding author:**

**Adrian Manea, Ph.D.**

**e-mail:** [adrian.manea@icbp.ro](mailto:adrian.manea@icbp.ro)

**Institute of Cellular Biology and Pathology “Nicolae Simionescu”, 8, B.P. Hasdeu  
Street, 050568, Bucharest, Romania**

**Tel: (+4021) 319 27 37**

**Fax: (+4021) 319 45 19**

**Tables: Clinical characteristics of the patients**

| <b>Parameter</b>                           | <b>Patient 1</b> | <b>Patient 2</b> | <b>Patient 3</b> | <b>Patient 4</b> |
|--------------------------------------------|------------------|------------------|------------------|------------------|
| Gender: Female (F)/Male (M)                | M                | M                | M                | M                |
| Age (years)                                | 63               | 68               | 65               | 62               |
| BMI (body-mass index) (kg/m <sup>2</sup> ) | 33               | 29               | 25               | 22               |
| Current smoker                             | x                | x                | x                | x                |
| Former smoker                              | -                | -                | -                | -                |
| Alcohol consumption                        | -                | -                | -                | -                |
| Diabetes/duration (years)                  | 8                | -                | -                | -                |
| Hypertension                               | x                | x                | x                | -                |
| Other cardiac diseases                     | -                | -                | -                | -                |
| Peripheral artery disease (PAD)            | -                | x                | -                | -                |
| Glucose (mg/dl)                            | 95/97/107        | 98               | 108/88           | 104/124          |
| TC (mg/dl)                                 | 155              | -                | 128              | 247              |
| CHOL LDL (mg/dl)                           | -                | 178              | -                | 170              |
| CHOL HDL (mg/dl)                           | 46               | 59               | 33               | 53               |
| TG (mg/dl)                                 | 72               | 70               | 74               | 117              |
| <b>Medication</b>                          |                  |                  |                  |                  |
| Aspirin (mg/day)                           | 75               | 75               | 75               | -                |
| Insulin                                    | -                | -                | -                | -                |
| Metformin                                  | x                | -                | -                | -                |
| Sulphonylurea                              | OSTERN           | -                | -                | -                |
| Statin                                     | SORTIS           | SORTIS           | SORTIS           | -                |

| <b>Parameter</b>                           | <b>Patient 5</b>                                                      | <b>Patient 6</b> | <b>Patient 7</b> | <b>Patient 8</b> |
|--------------------------------------------|-----------------------------------------------------------------------|------------------|------------------|------------------|
| Gender: Female (F)/Male (M)                | M                                                                     | F                | M                | F                |
| Age (years)                                | 73                                                                    | 64               | 57               | 67               |
| BMI (body-mass index) (kg/m <sup>2</sup> ) | 24                                                                    | 23               | 25               | -                |
| Current smoker                             | -                                                                     | x                | x                | -                |
| Former smoker                              | x                                                                     | -                | -                | -                |
| Alcohol consumption                        | -                                                                     | -                | -                | -                |
| Diabetes/duration (years)                  | -                                                                     | -                | -                | 7                |
| Hypertension                               | -                                                                     | x                | x                | x                |
| Other cardiac diseases                     | Coronary artery bypass grafting (CABG) x 2<br>Mitral valve prosthesis | -                | -                | -                |
| Peripheral artery disease (PAD)            | x                                                                     | -                | x                | -                |
| Glucose (mg/dl)                            | 101                                                                   | 161/111          | 98/138/131       | 155/166          |
| TC (mg/dl)                                 | 193                                                                   | 227              | 217              | -                |
| CHOL LDL (mg/dl)                           | 125                                                                   | 132              | 152              | -                |
| CHOL HDL (mg/dl)                           | 50                                                                    | 70               | 29               | -                |
| TG (mg/dl)                                 | 90                                                                    | 123              | -                | -                |
| <b>Medication</b>                          |                                                                       |                  |                  |                  |
| Aspirin (mg/day)                           | 100                                                                   | 75               | 75               | 75               |
| Insulin                                    | -                                                                     | -                | -                | -                |
| Metformin                                  | -                                                                     | -                | -                | x                |
| Sulphonylurea                              | -                                                                     | -                | -                | -                |
| Statin                                     | SORTIS                                                                | SORTIS           | CRESTOR          | CRESTOR          |

| <b>Parameter</b>                           | <b>Patient 9</b> | <b>Patient 10</b> | <b>Patient 11</b>    | <b>Patient 12</b>      |
|--------------------------------------------|------------------|-------------------|----------------------|------------------------|
| Gender: Female (F)/Male (M)                | F                | M                 | F                    | M                      |
| Age (years)                                | 43               | 65                | 67                   | 50                     |
| BMI (body-mass index) (kg/m <sup>2</sup> ) | 22               | 25                | 27                   | 26                     |
| Current smoker                             | x                | -                 | -                    | x                      |
| Former smoker                              | -                | x                 | -                    | -                      |
| Alcohol consumption                        | -                | -                 | -                    | -                      |
| Diabetes/duration (years)                  | -                | -                 | 8                    | 10                     |
| Hypertension                               | -                | x                 | x                    | x                      |
| Other cardiac diseases                     | -                | -                 | Mitral insufficiency | Ischemic heart disease |
| Peripheral artery disease (PAD)            | -                | -                 | -                    | x                      |
| Glucose (mg/dl)                            | 88/98            | 184/136           | 181/117/79/133       | 291/241                |
| TC (mg/dl)                                 | 127              | 98                | 152                  | 248                    |
| CHOL LDL (mg/dl)                           | 76               | -                 | -                    | 138                    |
| CHOL HDL (mg/dl)                           | 39               | 30                | 43                   | 47                     |
| TG (mg/dl)                                 | (VLDL = 11,2)    | 123               | 178                  | (VLDL = 62)            |
| <b>Medication</b>                          |                  |                   |                      |                        |
| Aspirin (mg/day)                           | -                | 75                | 75                   | 75                     |
| Insulin                                    | -                | -                 | -                    | x                      |
| Metformin                                  | -                | -                 | GLIBOMET             | -                      |
| Sulphonylurea                              | -                | -                 | -                    | -                      |
| Statin                                     | SORTIS           | CRESTOR           | SORTIS               | ROSUCARD               |

| <b>Parameter</b>                | <b>Patient 13</b> | <b>Patient 14</b>       | <b>Patient 15</b>       |
|---------------------------------|-------------------|-------------------------|-------------------------|
| Gender: Female (F)/Male (M)     | M                 | M                       | M                       |
| Age (years)                     | 73                | 71                      | 75                      |
| BMI (kg/m <sup>2</sup> )        | 18                | 28                      | -                       |
| Current smoker                  | x                 | x                       | -                       |
| Former smoker                   | -                 | -                       | -                       |
| Alcohol consumption             | x                 | -                       | -                       |
| Diabetes/duration (years)       | -                 | 12                      | -                       |
| Hypertension                    | x                 | -                       | x                       |
| Other cardiac diseases          | -                 | Coronary artery disease | Coronary artery disease |
| Peripheral artery disease (PAD) | x                 | -                       | -                       |
| Glucose (mg/dl)                 | 80/103            | 105/79                  | 135/107/115             |
| TC (mg/dl)                      | 108               | 153                     | 122                     |
| CHOL LDL (mg/dl)                | 55                | 95                      | 92                      |
| CHOL HDL (mg/dl)                | 32                | 35                      | 28                      |
| TG (mg/dl)                      | 101<br>(VLDL=20)  | 111                     | -                       |
| <b>Medication</b>               |                   |                         |                         |
| Aspirin (mg/day)                | 75                | 75                      | 75                      |
| Insulin                         | -                 | -                       | -                       |
| Metformin                       | -                 | SIOFOR                  | -                       |
| Sulphonylurea                   | -                 | -                       | -                       |
| Statin                          | SORTIS            | SORTIS                  | SORTIS                  |

**BMI:** body-mass index; **TC:** total cholesterol; **CHOL LDL:** cholesterol low-density lipoprotein fraction; **CHOL HDL:** cholesterol high-density lipoprotein fraction; **VLDL:** very low density lipoprotein fraction; **TG:** triglycerides.
